# Supplementary material for: Differential expression of heat shock proteins and antioxidant enzymes in response to temperature, starvation, and parasitism in the Carob moth larvae, Ectomyelois ceratoniae (Lepidoptera: Pyralidae)
Source: PubMed Central journal article supplement (PMC6988935; doi:10.1371/journal.pone.0228104), 2020-01-29
Supplement: pone.0228104.s002.pdf [file pone.0228104.s002.pdf]

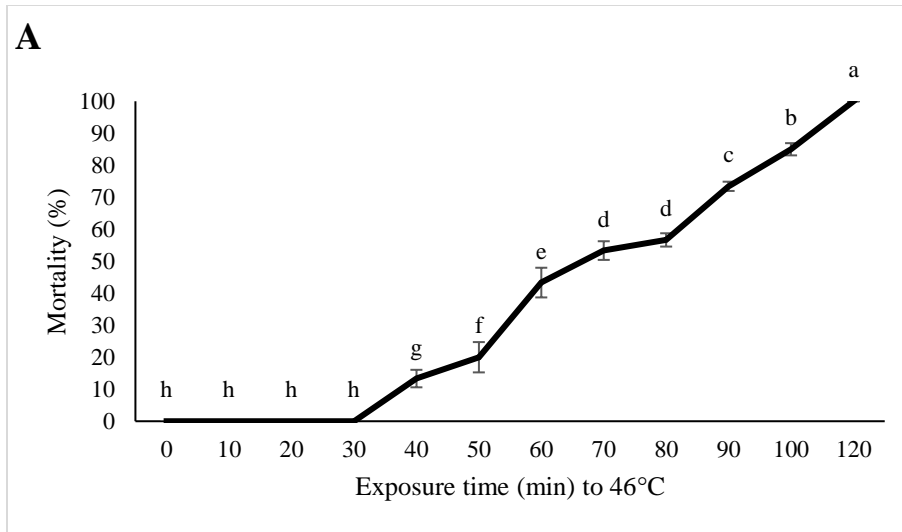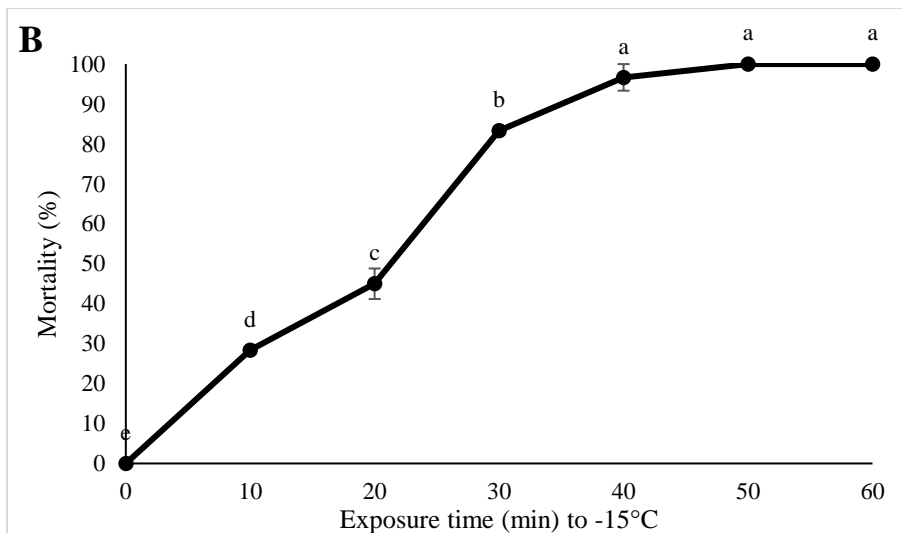

**Figure S2. Effect of exposure times on mortality of carob moth L5 larvae using (A) heat: 46°C for 120 min or (B) cold: -15°C for 30 min.**
