# Supplementary material for: Differential expression of heat shock proteins and antioxidant enzymes in response to temperature, starvation, and parasitism in the Carob moth larvae, Ectomyelois ceratoniae (Lepidoptera: Pyralidae)
Source: PubMed Central journal article supplement (PMC6988935; doi:10.1371/journal.pone.0228104), 2020-01-29
Supplement: pone.0228104.s003.pdf [file pone.0228104.s003.pdf]

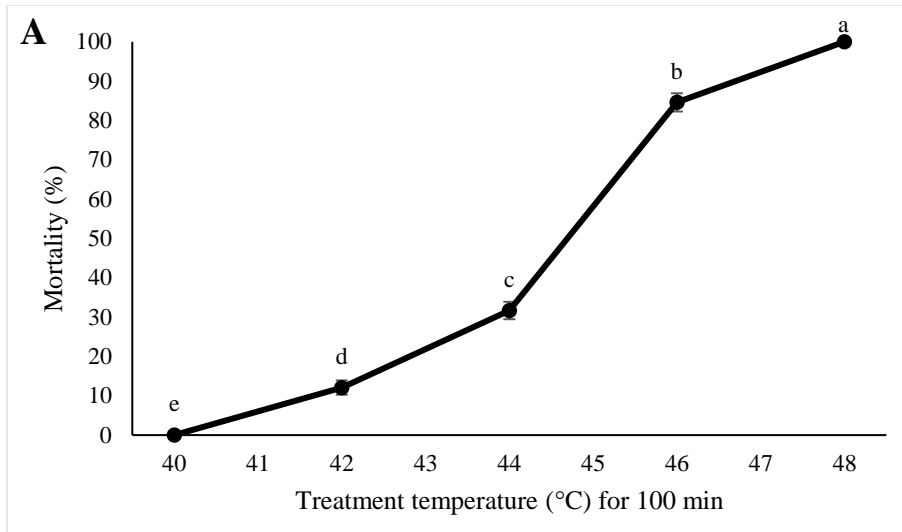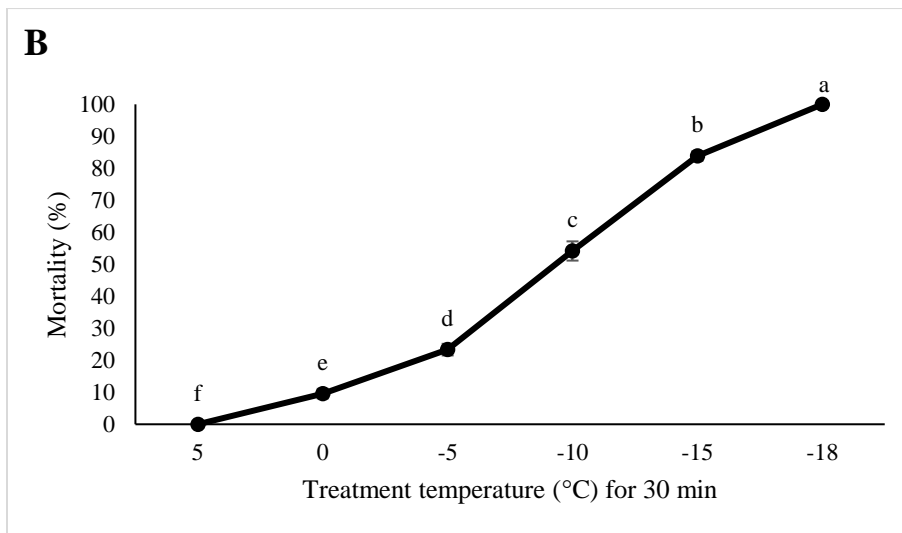

Figure S3. Effect of different (A) high or (B) low temperatures on mortality of carob moth L5 larvae.
