# Supplementary material for: Differential expression of heat shock proteins and antioxidant enzymes in response to temperature, starvation, and parasitism in the Carob moth larvae, Ectomyelois ceratoniae (Lepidoptera: Pyralidae)
Source: PubMed Central journal article supplement (PMC6988935; doi:10.1371/journal.pone.0228104), 2020-01-29
Supplement: pone.0228104.s004.pdf [file pone.0228104.s004.pdf]

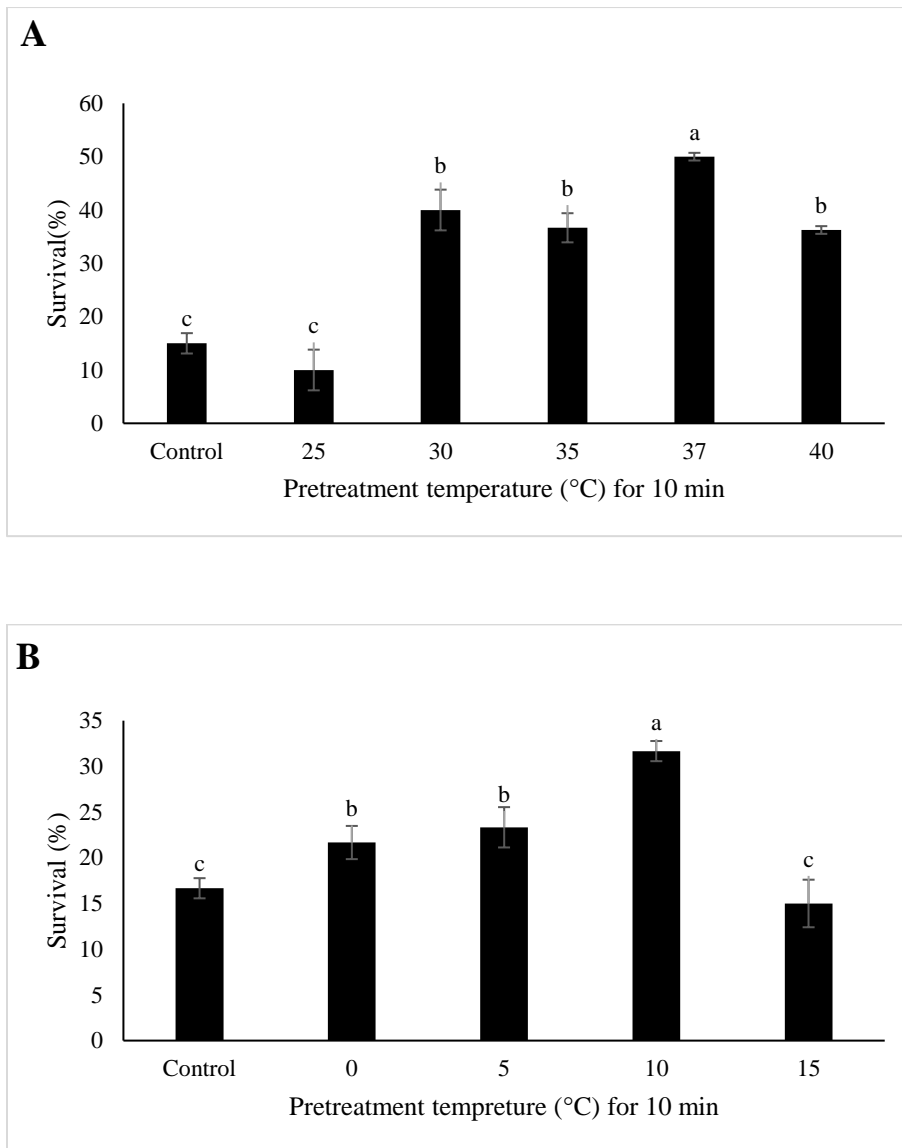

**Figure S4. Induction of extreme temperature tolerance in carob moth L5 larvae. Insects were pretreated for 10 min at various temperatures and then subjected to (A) 46°C for 100 min or (B) -15°C for 30 min.**
