# Supplementary material for: Differential expression of heat shock proteins and antioxidant enzymes in response to temperature, starvation, and parasitism in the Carob moth larvae, Ectomyelois ceratoniae (Lepidoptera: Pyralidae)
Source: PubMed Central journal article supplement (PMC6988935; doi:10.1371/journal.pone.0228104), 2020-01-29
Supplement: pone.0228104.s005.pdf [file pone.0228104.s005.pdf]

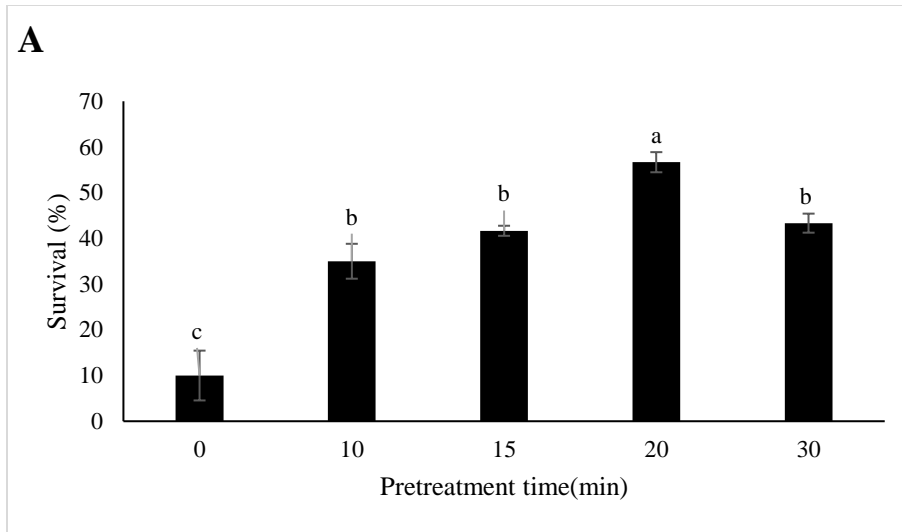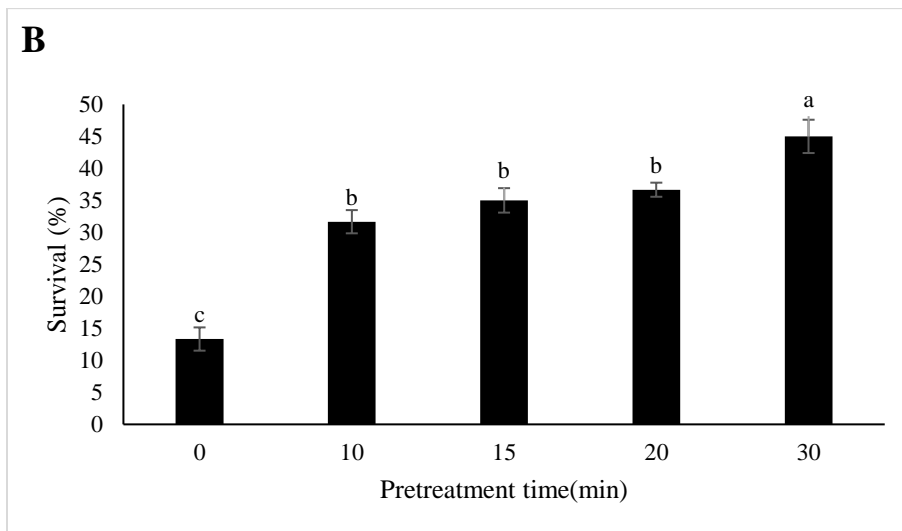

**Figure S5. Induction of extreme temperature tolerance by varying duration of (A) 37°C pretreatments or (B) 10°C pretreatments and then subjected to (A) 46°C for 100 min or (B) -15°C for 30 min.**
